# Supplementary material
Source: Springer Nature journal article supplement (https://www.springermedizin.de/resource/supplementary/13053_2013_455_MOESM4_ESM.pdf/9673890)
Supplement: MOESM4 [file 9673890]

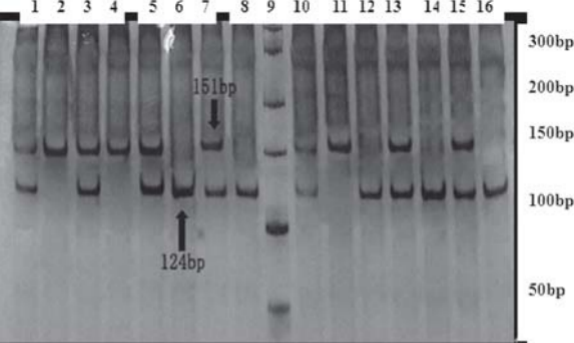

Lane 6, 8, 12, 14, 15 : Homozygous A/A genotype

Lane 2, 4, 11, : Homozygous G/G genotype

Lane 9 : 75bp DNA Fragment Marker

Lane 1, 3, 5, 7, 10, 13, 16 : Heterozygous A/G genotype
